# Supplementary material
Source: Research Square preprint supplement (doi:10.21203/rs.3.rs-9156400/v1)
Supplement: Supplementary file 1 [file 59b3bf07414f0204375b5a81.docx]

Supporting Information


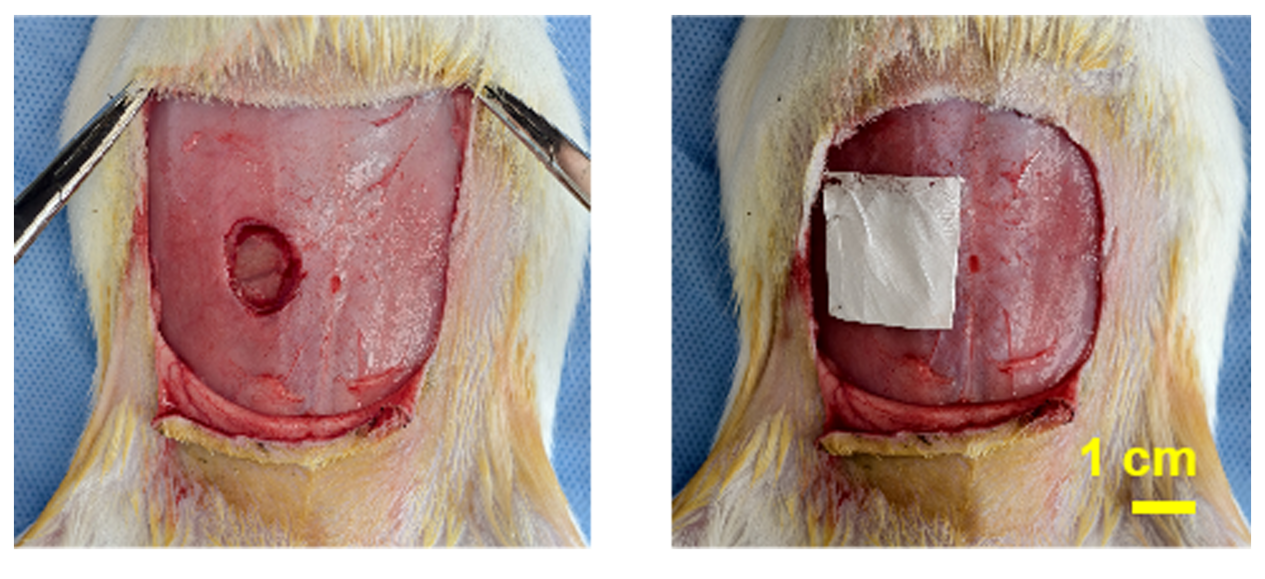


**Fig.S1** Before and after the placement of the electrospun membranes.


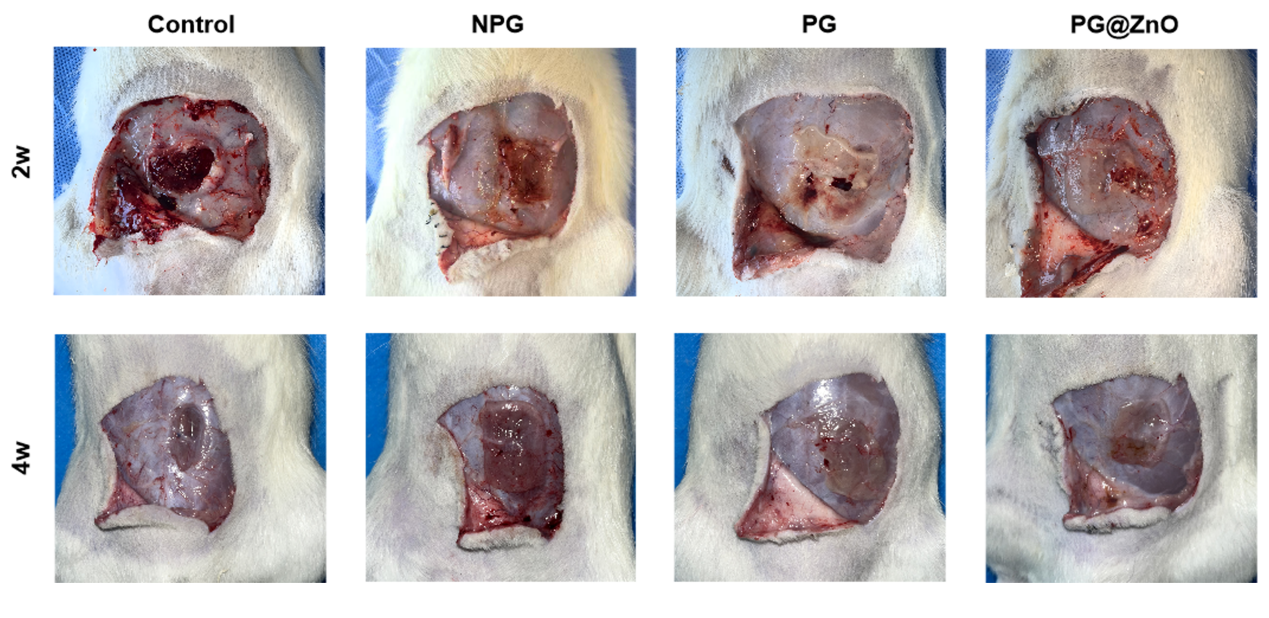


**Fig.S2** Healing outcomes in different treatment groups were assessed on Weeks 2 and 4.
